# Supplementary material for: Technical note: Skirt chamber – an open dynamic method for the rapid and minimally intrusive measurement of greenhouse gas emissions from peatlands
Source: Copernicus journal article supplement (doi:10.5194/bg-20-3737-2023), 2023-09-15
Supplement: Supplementary file 1 [file bg-20-3737-2023-supplement.pdf]

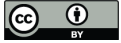

*Supplement of*

**Technical note: Skirt chamber – an open dynamic method for the rapid and minimally intrusive measurement of greenhouse gas emissions from peatlands**

**Frederic Thalasso et al.**

*Correspondence to:* Frederic Thalasso (thalasso@cinvestav.mx) and Armando Sepulveda-Jauregui (armando.sepulveda@umag.cl)

The copyright of individual parts of the supplement might differ from the article licence.

## Supporting Information

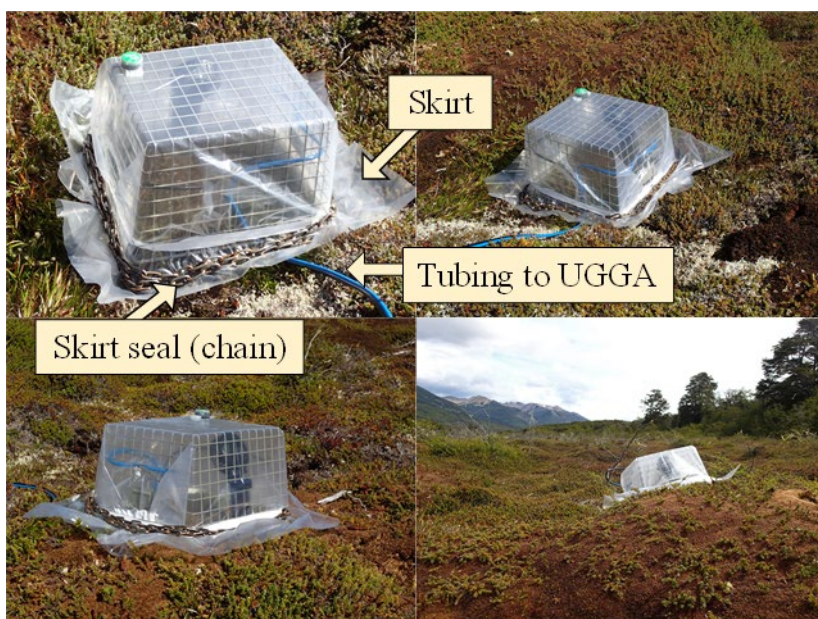

**Figure S1:** Photographs of the skirt-chamber under different configurations.

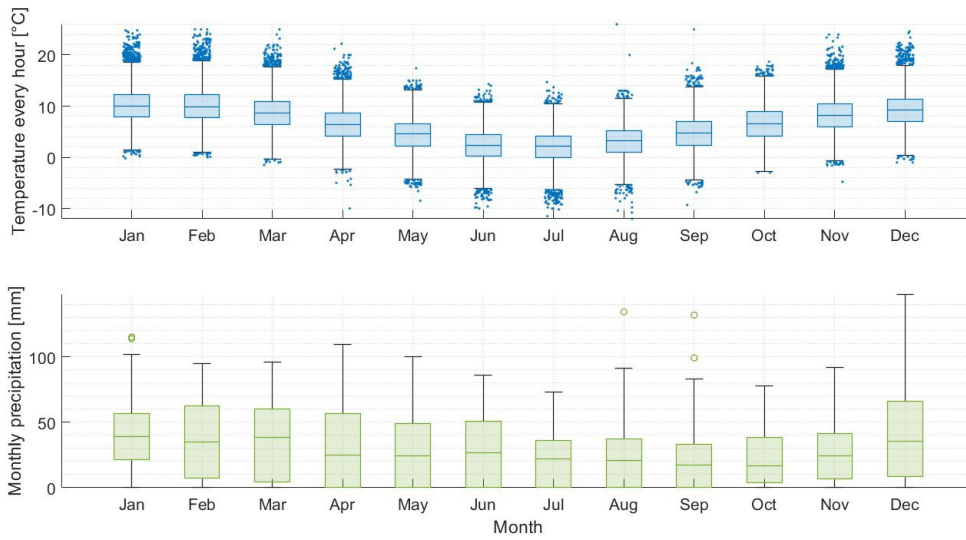

**Figure S2:** Puerto Williams climatogram at the Guardiamarina Zañartu airport, located 1800 m northeast of the studied peatlands (DGAC, 2023).

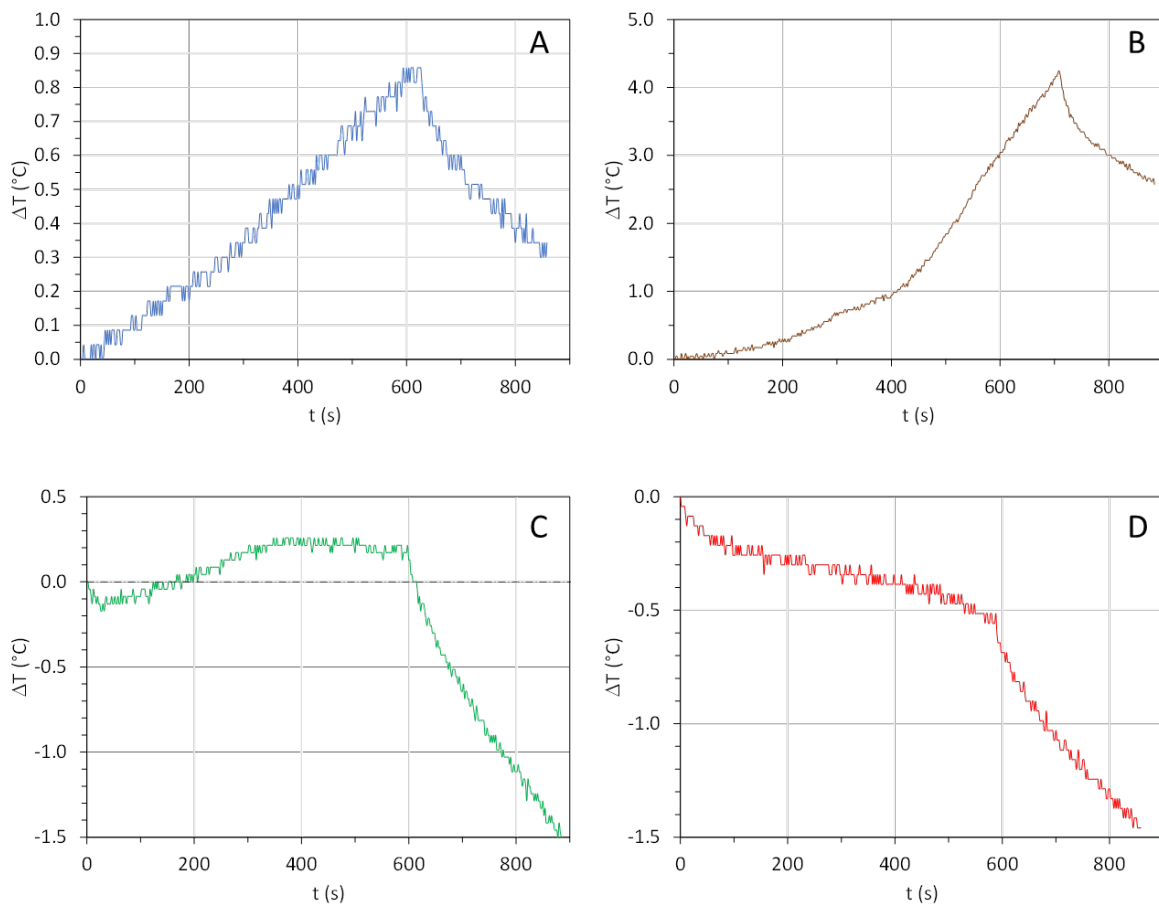

**Figure S3:** Examples of temperature behavior observed within the chamber during its deployment. The observed decrease at  $t > 600$  s corresponds to Step 4 (dark screen deployment).

**Table S1:**  $R_{CO_2}$  measured at 16 locations divided in four transects, on three occasions, i.e. at  $t = 0, 2$  and 12 days. \*: hotspots.

| #  | Transect | t (d)      |            |            | CV  |
|----|----------|------------|------------|------------|-----|
|    |          | 0          | 2          | 12         |     |
| 1  | 1        | 235 ± 19   | 103 ± 40   | 174 ± 40   | 39% |
| 2  | 1        | 97 ± 51    | 135 ± 398  | 97 ± 83    | 20% |
| 3  | 1        | 110 ± 26   | 214 ± 65   | 172 ± 46   | 32% |
| 4  | 1        | 184 ± 12   | 205 ± 99   | 157 ± 55   | 13% |
| 5  | 2        | 511 ± 103  | 390 ± 174* | 559 ± 150* | 18% |
| 6  | 2        | 688 ± 125* | 271 ± 231  | 434 ± 127  | 45% |
| 7  | 2        | 178 ± 54   | 382 ± 232* | 373 ± 205  | 37% |
| 8  | 2        | 187 ± 61   | 133 ± 45   | 134 ± 44   | 20% |
| 9  | 3        | 692 ± 53*  | 286 ± 342  | 661 ± 177* | 41% |
| 10 | 3        | 356 ± 42   | 179 ± 37   | 188 ± 31   | 41% |
| 11 | 3        | 709 ± 70*  | 378 ± 120  | 711 ± 103* | 32% |
| 12 | 3        | 358 ± 21   | 561 ± 147* | 337 ± 50   | 30% |
| 13 | 4        | 270 ± 16   | 31 ± 27    | 132 ± 28   | 83% |
| 14 | 4        | 549 ± 26   | 203 ± 44   | 343 ± 25   | 48% |
| 15 | 4        | 215 ± 24   | 230 ± 61   | 267 ± 58   | 11% |
| 16 | 4        | 249 ± 31   | 380 ± 30   | 266 ± 24   | 24% |
|    | Mean     | 350 ± 213  | 256 ± 136  | 313 ± 192  |     |
|    | CV       | 61%        | 53%        | 61%        |     |

**Table S2:** Percentage of chamber area covered by the major plant and lichen species and by exposed peat surface, at 16 locations divided into four transects (same locations as Tables 2 and S1). **Sm**, *Sphagnum magellanicum*; **E**, *Ericaceae* species (*Empetrum rubrum* and/or *Gaultheria pumila*); **Tm**, *Tetroncium magellanicum*; **Na**, shrubby *Nothofagus antarctica*; **P**, *Polytrichum spp.*; **L**, Lichens (*Cladonia arbuscula* and/or *Coelopogon epiphorellus*); **Pt**, exposed peat.

| #  | Transect | <b>Sm</b> | <b>E</b> | <b>Tm</b> | <b>Na</b> | <b>P</b> | <b>L</b> | <b>Pt</b> |
|----|----------|-----------|----------|-----------|-----------|----------|----------|-----------|
| 1  | 1        | 62.3      | 37.7     | 0.0       | 0.0       | 0.0      | 0.0      | 0.0       |
| 2  | 1        | 0.0       | 91       | 0.0       | 0.0       | 0.0      | 0.9      | 0.0       |
| 3  | 1        | 0.0       | 1.9      | 1.5       | 0.0       | 8.3      | 17.8     | 70.6      |
| 4  | 1        | 0.0       | 79.3     | 0.0       | 0.0       | 0.0      | 20.7     | 0.0       |
| 5  | 2        | 0.0       | 85.9     | 9.9       | 0.0       | 0.0      | 4.2      | 0.0       |
| 6  | 2        | 0.0       | 19.7     | 79        | 0.6       | 0.0      | 0.7      | 0.0       |
| 7  | 2        | 0.0       | 80.4     | 2.8       | 0.0       | 0.0      | 16.8     | 0.0       |
| 8  | 2        | 0.0       | 22.5     | 11.4      | 0.0       | 0.0      | 60.3     | 5.8       |
| 9  | 3        | 0.0       | 0.0      | 95.2      | 4.8       | 0.0      | 0.0      | 0.0       |
| 10 | 3        | 0.0       | 74.5     | 0.0       | 0.0       | 0.0      | 19.3     | 6.2       |
| 11 | 3        | 34.7      | 25.8     | 39.5      | 0.0       | 0.0      | 0.0      | 0.0       |
| 12 | 3        | 0.0       | 66.2     | 4.1       | 0.0       | 0.8      | 28.9     | 0.0       |
| 13 | 4        | 0.0       | 0.0      | 0.0       | 0.0       | 30       | 4.9      | 65.5      |
| 14 | 4        | 0.0       | 57.9     | 0.3       | 0.0       | 0.0      | 40.1     | 1.7       |
| 15 | 4        | 85.8      | 15.4     | 0.9       | 0.0       | 0.0      | 0.0      | 0.0       |
| 16 | 4        | 0.0       | 89.7     | 1.5       | 0.0       | 0.0      | 8.9      | 0.0       |

## References

DGAC: Temperature and precipitation data from 1961-2022 data, Dirección General De Aeronáutica Civil Dirección Meteorológica de Chile, Servicios Climáticos, <https://climatologia.meteochile.gob.cl/>
